# Supplementary material for: Aminal linked inorganic–organic hybrid nanoporous materials (HNMs) for CO2 capture and H2 storage applications
Source: Royal Society of Chemistry journal article supplement (doi:10.1039/c5ra25933a), 2016-01-01
Supplement: c5ra25933a1.pdf [file c5ra25933a1.pdf]

# Aminal linked inorganic-organic hybrid nanoporous materials (HNMs) for CO<sub>2</sub> capture and H<sub>2</sub> storage applications

Raeesh Muhammad, Pawan Rekha and Paritosh Mohanty\*

Department of Chemistry, Indian Institute of Technology Roorkee, Roorkee, Uttarakhand - 247667, INDIA

\*Email: pmfcy@iitr.ac.in, paritosh75@gmail.com

## FT-IR and NMR spectroscopic investigation of compound-I

FT-IR: 1702 cm<sup>-1</sup> (C=O), 1570 cm<sup>-1</sup> (aromatic C=C), 1209 and 1160 cm<sup>-1</sup> (P=N), 1015 cm<sup>-1</sup> (P-O-C)

<sup>1</sup>H NMR (400 MHz, CDCl<sub>3</sub>, 298 K): δ 9.95 (s, COH), 7.75 (d, Ar-H), 7.17 (d, Ar-H)

<sup>13</sup>C NMR (100 MHz, CDCl<sub>3</sub>, 298 K): δ 190 (C=O), δ 155 (ArCO), δ 134 (ArCH), δ 132 (ArCH) and δ 122 (ArC)

<sup>31</sup>P NMR (161 MHz, CDCl<sub>3</sub>, 298 K): δ 7.04 (s)

Elemental analysis: Theoretical formula: C<sub>42</sub>H<sub>30</sub>N<sub>3</sub>O<sub>12</sub>P<sub>3</sub>

C, 58.55; H, 3.51; N, 4.88

Experimentally observed formula:

C, 58.09; H, 3.50; N, 4.85

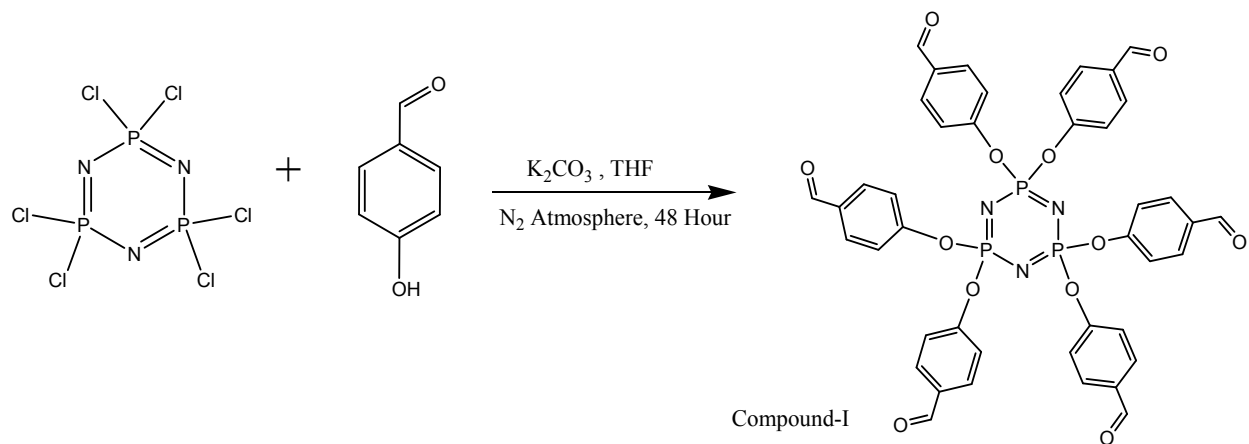

**Scheme S1: Reaction scheme for the synthesis of compound - I.**

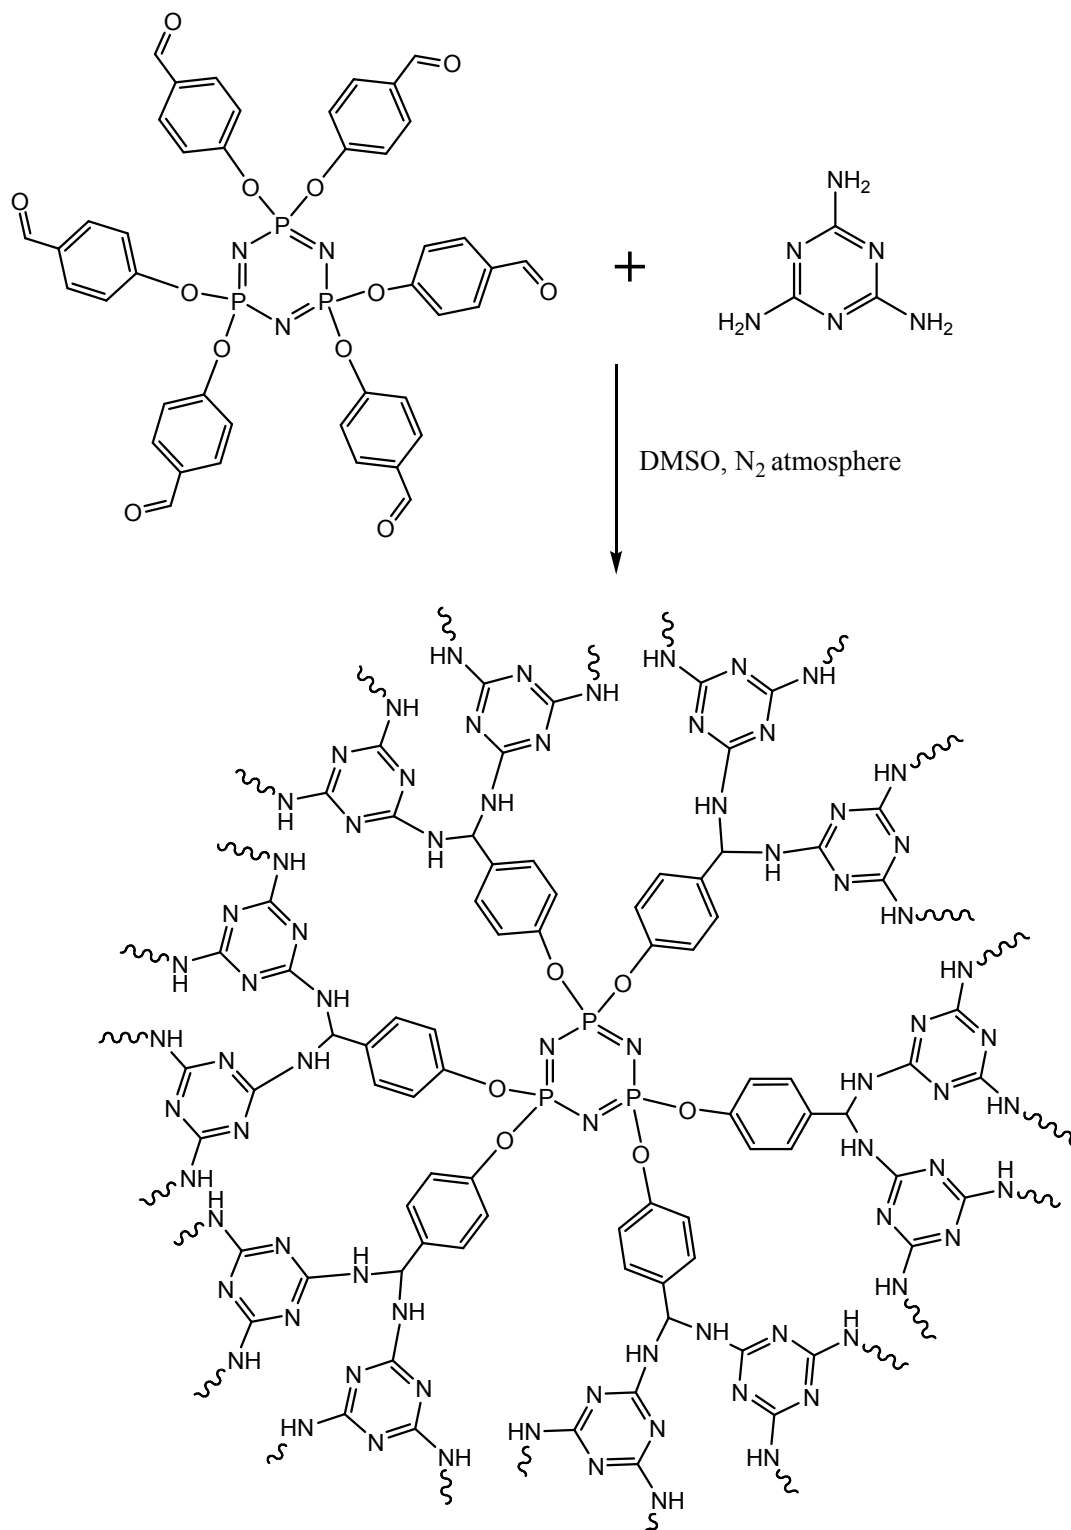

**Scheme S2: Reaction scheme for the synthesis of HNMs.**

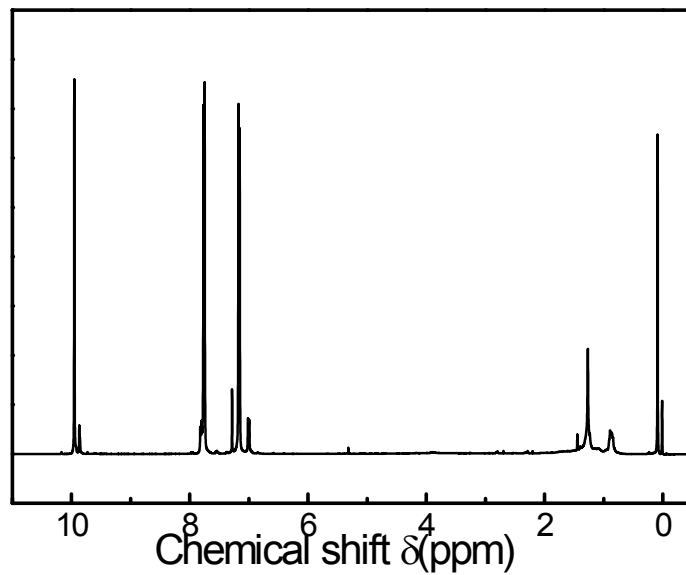

**Figure S1:  $^1\text{H}$  NMR spectrum.**  $^1\text{H}$  NMR spectrum of compound-I collected in  $\text{CDCl}_3$ .

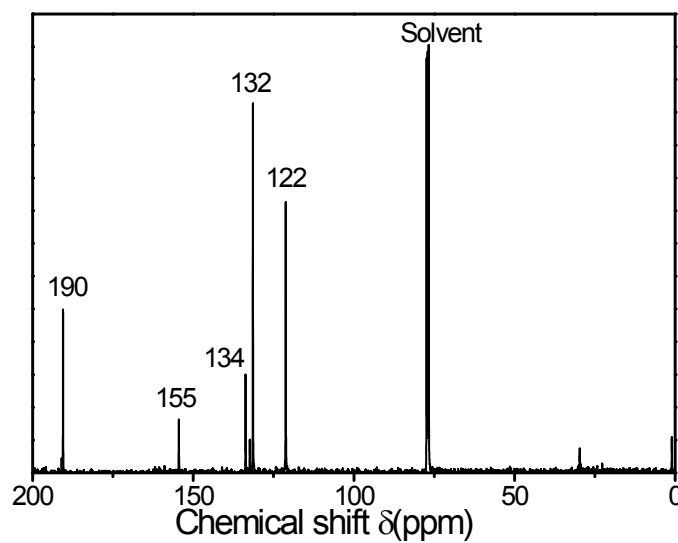

**Figure S2:  $^{13}\text{C}$  NMR spectrum.**  $^{13}\text{C}$  NMR spectrum of compound-I collected in  $\text{CDCl}_3$ .

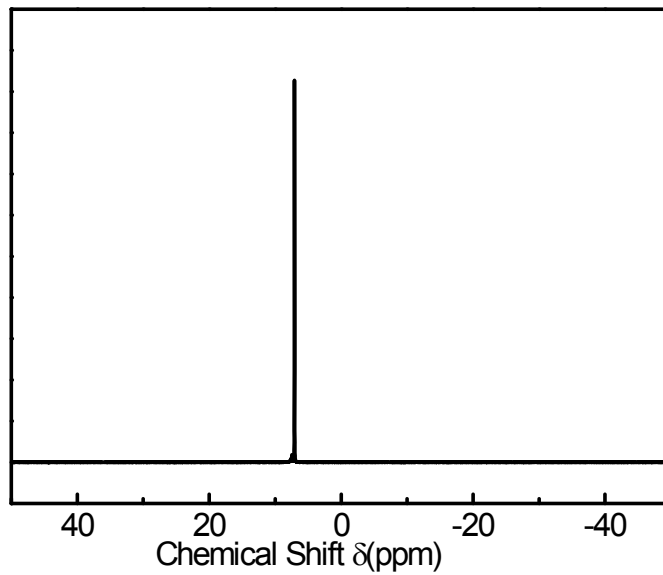

**Figure S3:  $^{31}\text{P}$  NMR spectrum.**  $^{31}\text{P}$  NMR spectrum of compound-I collected in  $\text{CDCl}_3$ .

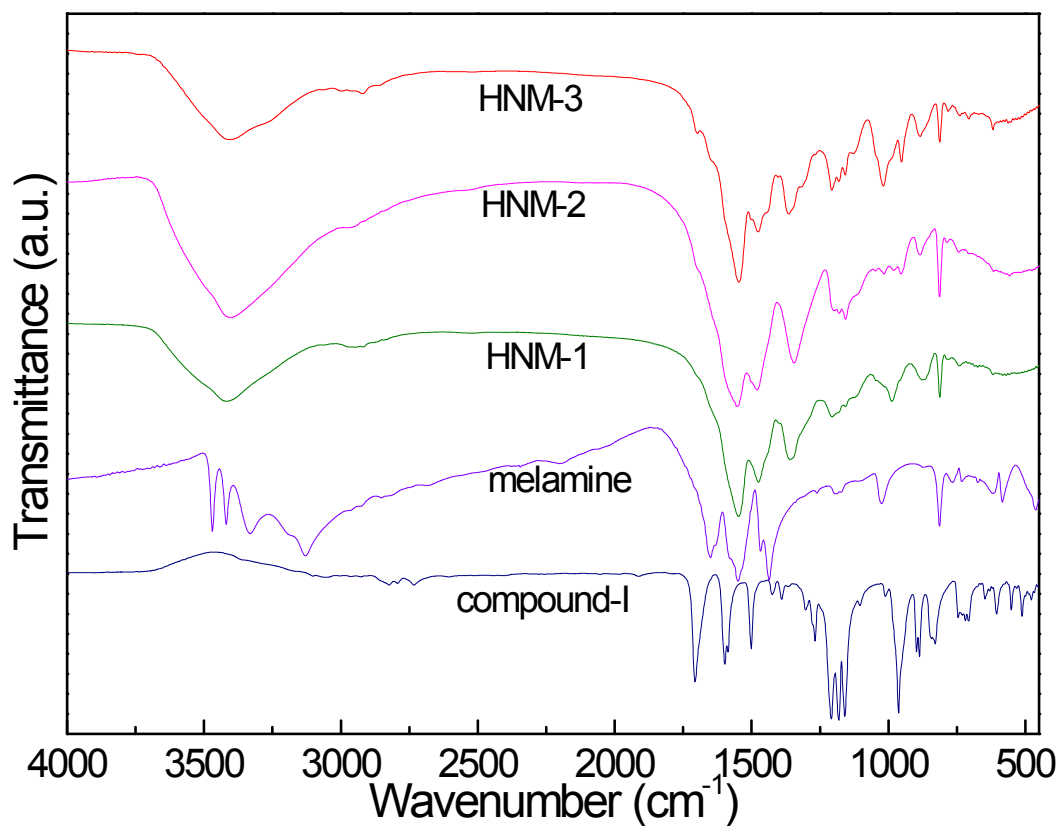

**Figure S4: FT-IR spectra**

**Table S1: Assignment of FT-IR Bands**

| Bands (cm <sup>-1</sup> ) | Assignment                               | References |
|---------------------------|------------------------------------------|------------|
| 3420                      | Aminal N-H stretching                    | S2, S3     |
| 2930                      | Aliphatic C-H stretching                 | S2, S3     |
| 1650                      | NH <sub>2</sub> deformation band         | S2, S3     |
| 1600                      | C=C aromatic ring stretching             | S2, S3, S4 |
| 1550                      | quadrant stretching of s-triazine ring   | S2         |
| 1480                      | semicircle stretching of s-triazine ring | S2         |
| 1360                      | Ring and side chain CN stretching        | S3         |
| 1200-1160                 | $\nu_{as}(P=N-P)$ ,                      | S1         |
| 960                       | $\nu_{as}(P-O-P)$ vibration              | S1, S6     |
| 814                       | Ring breathing ring def. (out of plane)  | S2         |
| 520                       | $\delta(P=N-P)$ vibration                | S1, S6     |

**Table S2 (a): Assignment of  $^{13}\text{C}$  CP-MAS NMR resonance signals for HNM-1**

| Peaks (ppm) | Assignment               | References |
|-------------|--------------------------|------------|
| 166         | C of triazine ring (C-1) | S2         |
| 155         | C of benzene ring (C-2)  | S1         |
| 135         | C of benzene ring (C-3)  | S3, S4     |
| 131         | C of benzene ring (C-4)  | S3, S4     |
| 120         | C of benzene ring (C-5)  | S3         |
| 55          | tertiary carbon (C-6)    | S2, S5     |

**Table S2 (b): Assignment of  $^{31}\text{P}$  CP-MAS NMR resonance signal for HNM-1**

| Peaks (ppm) | Assignment      | References |
|-------------|-----------------|------------|
| 9.6         | P of PNC moiety | S1         |

**Table S3: Elemental Analysis for HNMs**

Calculated for  $\text{C}_{78}\text{H}_{66}\text{N}_{75}\text{O}_3\text{P}_3$ ; N: 46.84, C: 41.77, H: 2.97, O: 4.28, P: 4.14.

| Sample ID | Observed |       |      |      |
|-----------|----------|-------|------|------|
|           | N        | C     | H    | O    |
| HNM-1     | 42.16    | 40.18 | 4.46 | 5.25 |
| HNM-2     | 41.14    | 40.28 | 5.69 | 5.52 |
| HNM-3     | 36.13    | 31.78 | 6.20 | 6.23 |

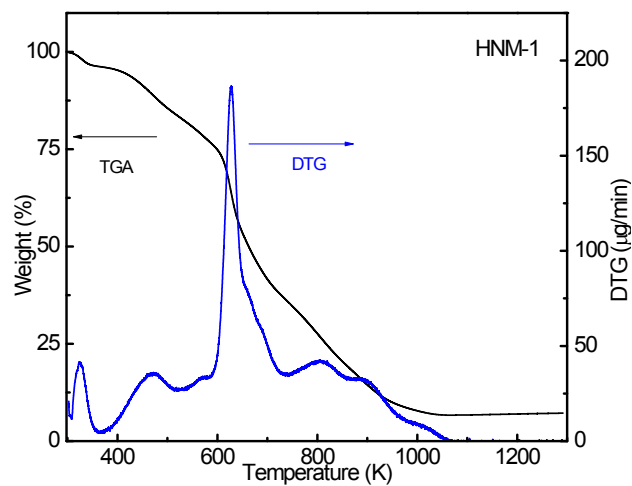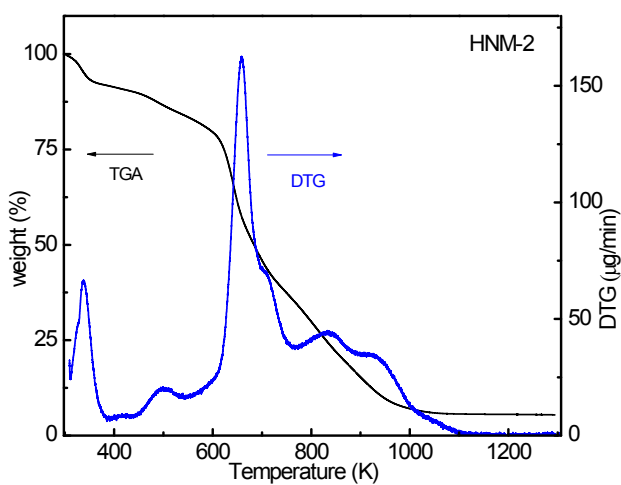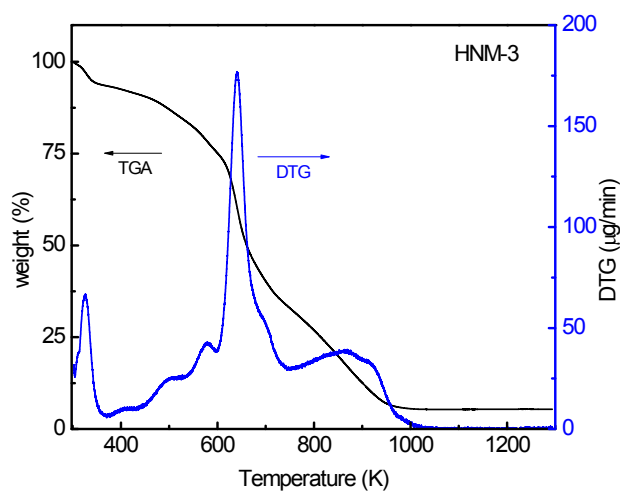

**Figure S5: HNMs thermogravimetry thermograms measured in air.** TGA and DTG thermograms of (a) HNM-1, (b) HNM-2 and (c) HNM-3 measured in air with a heating rate of 5 K/min.



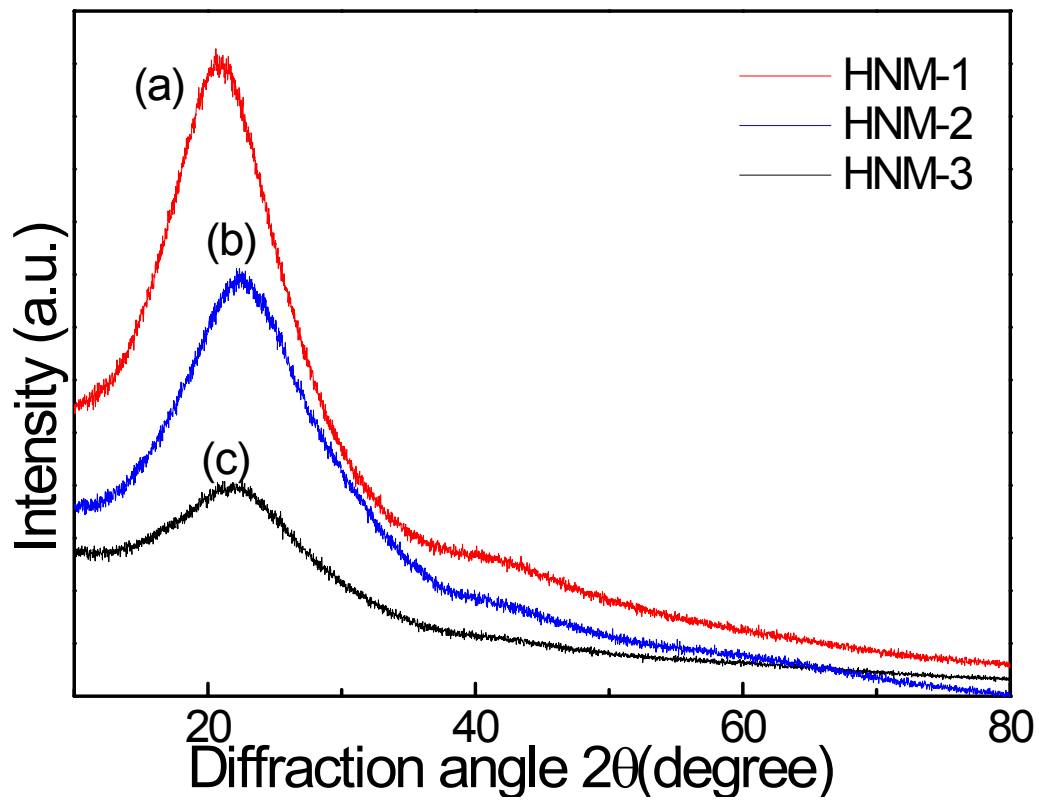

**Figure S6: XRD spectra of HNMs.** X-ray diffraction patterns of (a) HNM-1, (b) HNM-2 and (c) HNM-3.

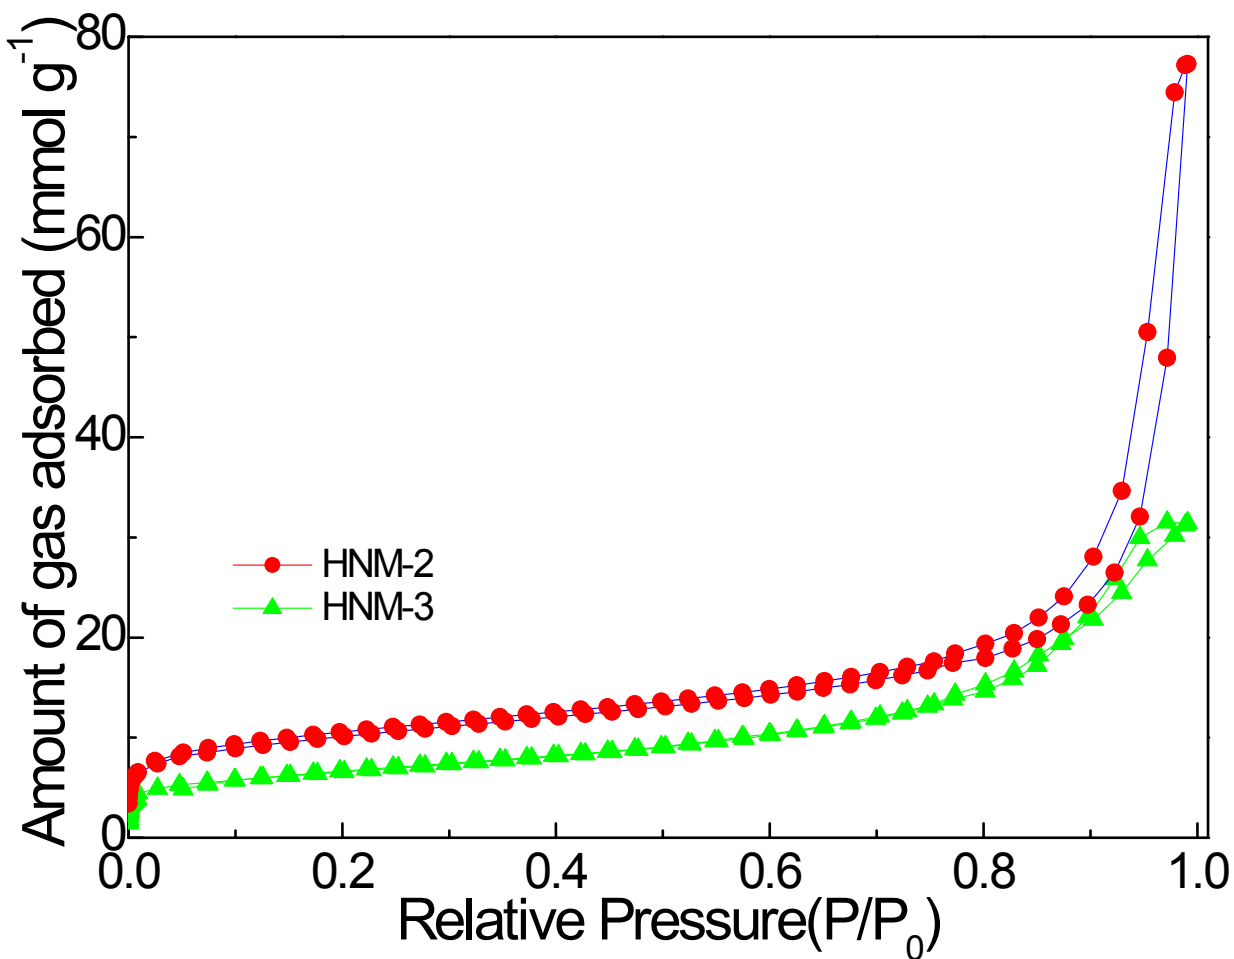

**Figure S7: N<sub>2</sub> sorption isotherm;** N<sub>2</sub> sorption isotherm of HNM-2 and HNM-3, measured at 77 K.

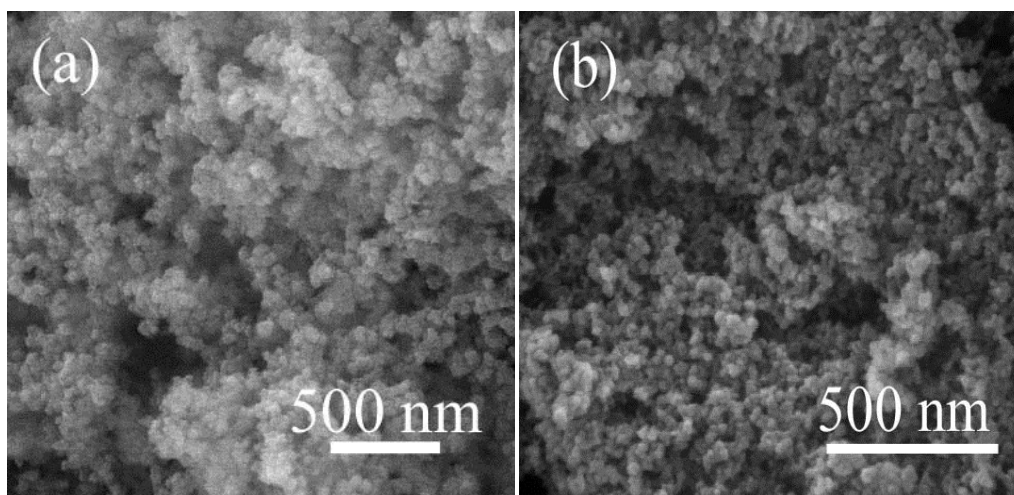

**Figure S8:** (a) and (b) FE-SEM image of HNM-2 and HNM-3, respectively.

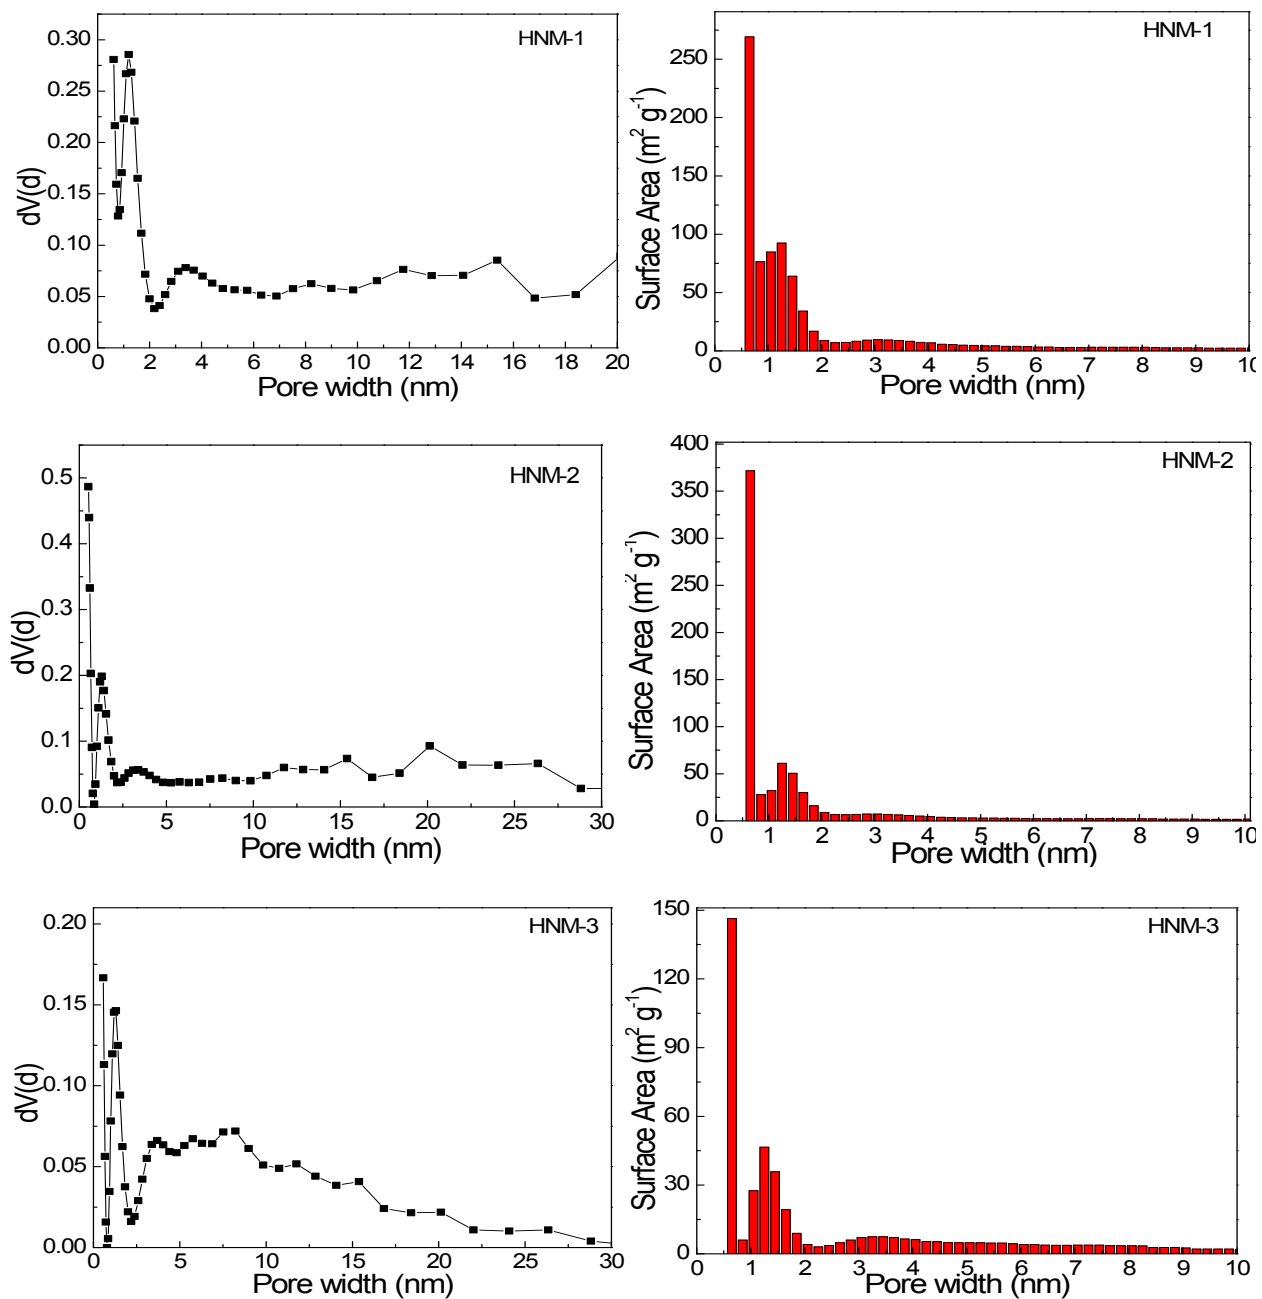

**Figure S9: DFT pore size distribution of HNMs.** Pore size distribution of HNM-1, HNM-2 and HNM-3 calculated from the  $\text{N}_2$  sorption isotherm measured at 77 K using the Density Functional Theory (DFT) method.

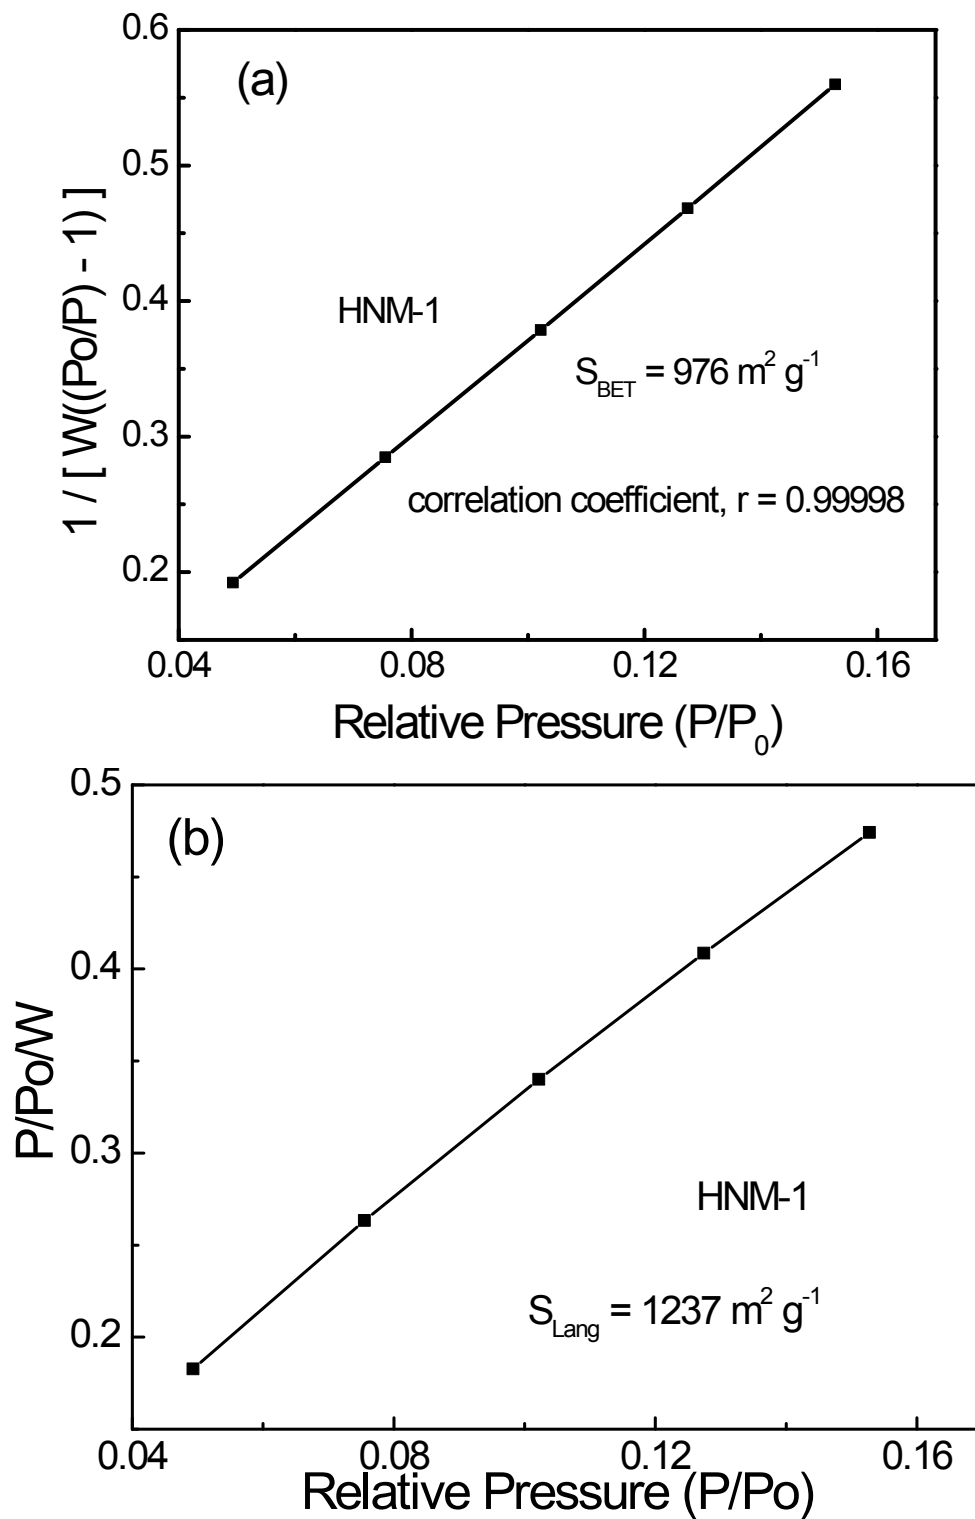

**Figure S10: Multi-Point BET plot and Langmuir plot.** (a) Multi-Point BET plot of HNM-1 and (b) Langmuir plot of HNM-1 calculated from the  $\text{N}_2$  isotherm measured at 77 K.

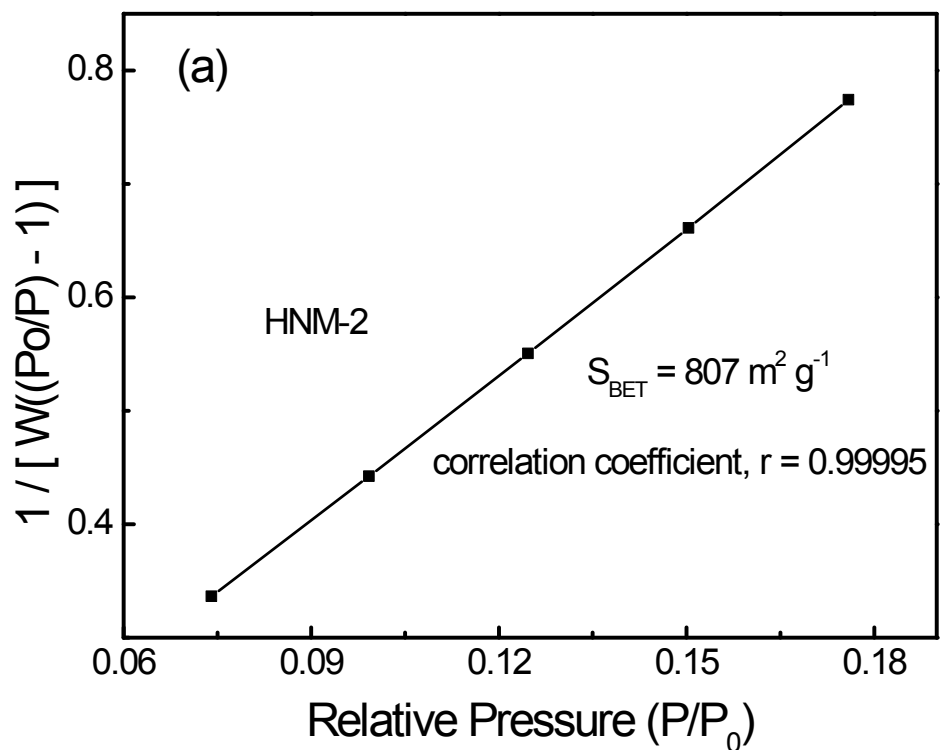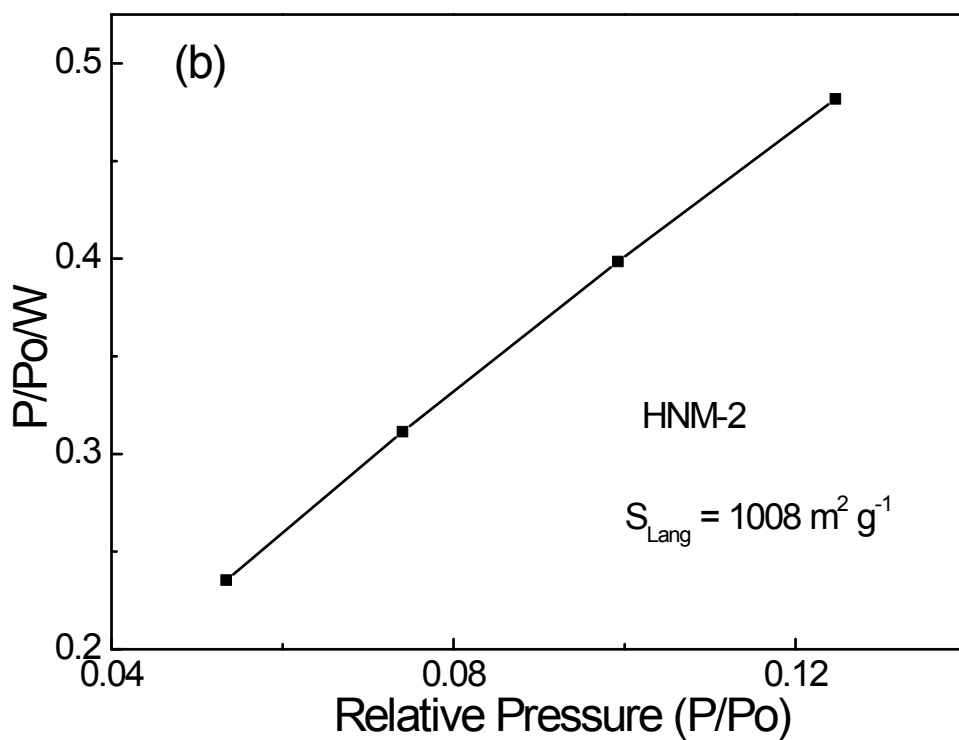

**Figure S11: Multi-Point BET plot and Langmuir plot.** (a) Multi-Point BET plot of HNM-2 and (b) Langmuir plot of HNM-2 calculated from the  $\text{N}_2$  isotherm measured at 77 K.

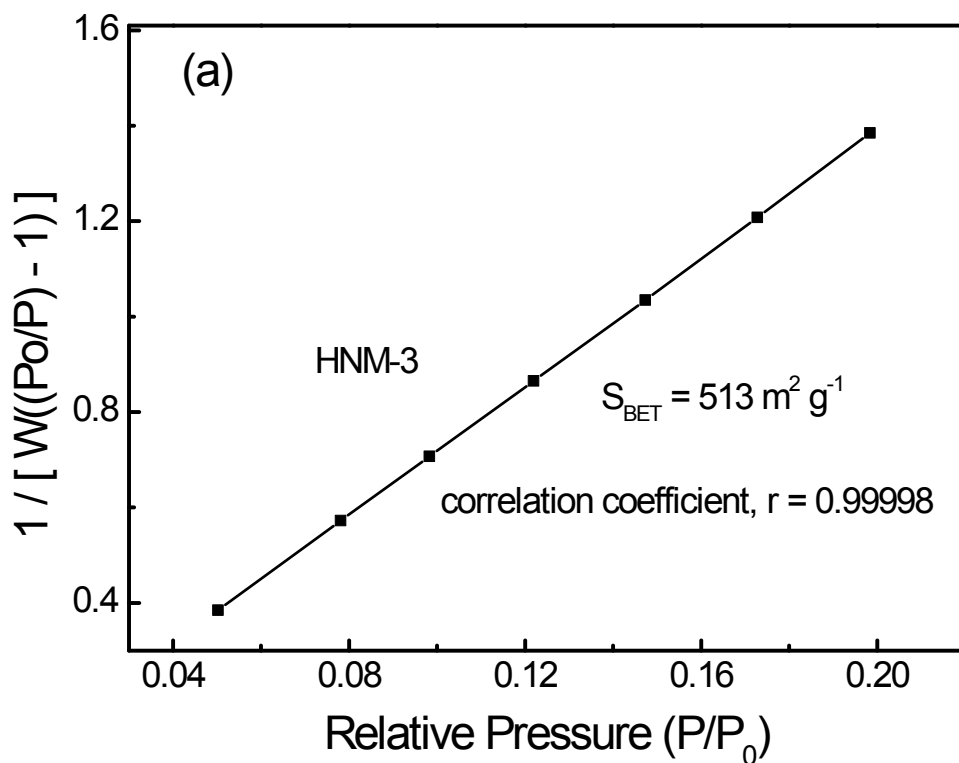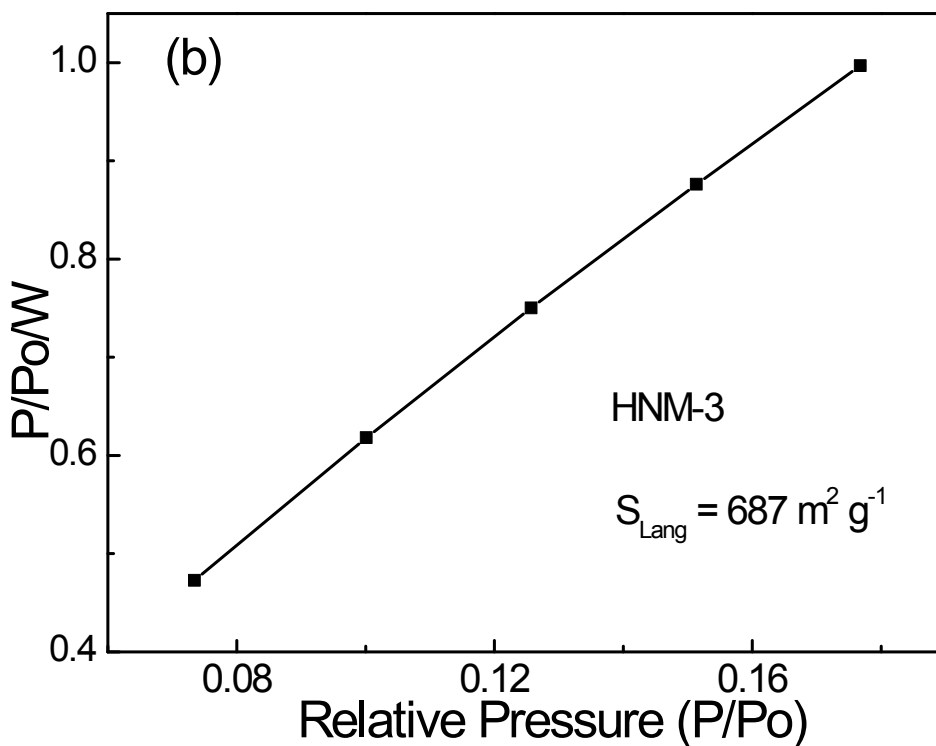

**Figure S12: Multi-Point BET plot and Langmuir plot.** (a) Multi-Point BET plot of HNM-3 and (b) Langmuir plot of HNM-3 calculated from the  $\text{N}_2$  isotherm measured at 77 K.

**Table-S4: Summary of Porosity and Pore Volumes for HNMs**

| Sample | Surface Area From N <sub>2</sub> Sorption at 77 K<br>(m <sup>2</sup> g <sup>-1</sup> ) |                          |          | DFT and Monte-Carlo<br>Cumulative                    |                                                      | Total<br>pore<br>volume<br>(cm <sup>3</sup> g <sup>-1</sup> ) |
|--------|----------------------------------------------------------------------------------------|--------------------------|----------|------------------------------------------------------|------------------------------------------------------|---------------------------------------------------------------|
|        |                                                                                        |                          |          | Surface<br>Area (m <sup>2</sup><br>g <sup>-1</sup> ) | Pore<br>volume<br>(cm <sup>3</sup> g <sup>-1</sup> ) |                                                               |
|        | BET                                                                                    | External Surface<br>Area | Langmuir | N <sub>2</sub> at 77K                                | N <sub>2</sub> at 77K                                | N <sub>2</sub> at<br>77K                                      |
| HNM-1  | 976                                                                                    | 603                      | 1237     | 967                                                  | 2.11                                                 | 1.05                                                          |
| HNM-2  | 807                                                                                    | 493                      | 969      | 861                                                  | 1.83                                                 | 0.86                                                          |
| HNM-3  | 513                                                                                    | 403                      | 687      | 517                                                  | 1.03                                                 | 0.67                                                          |

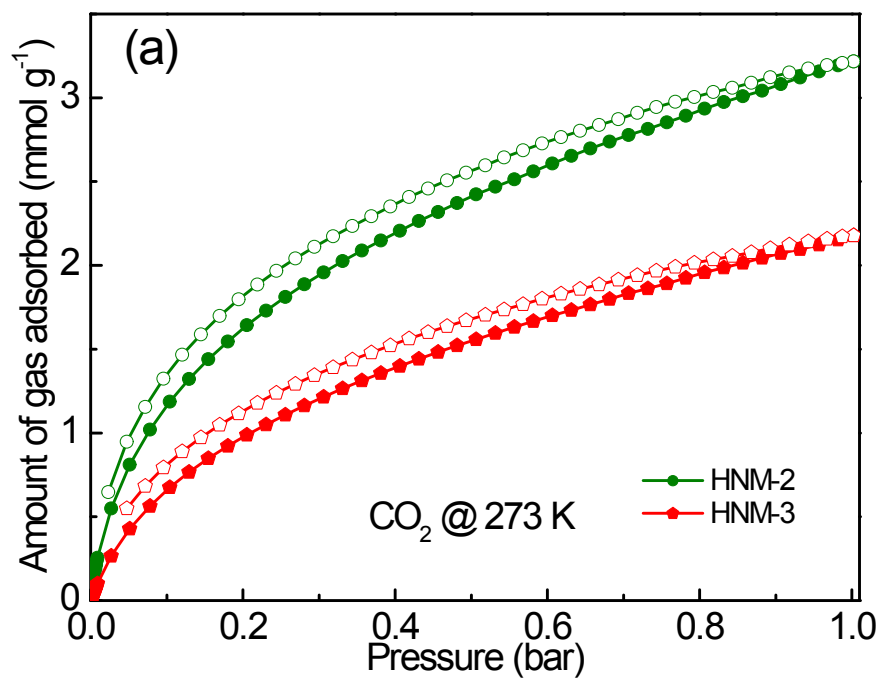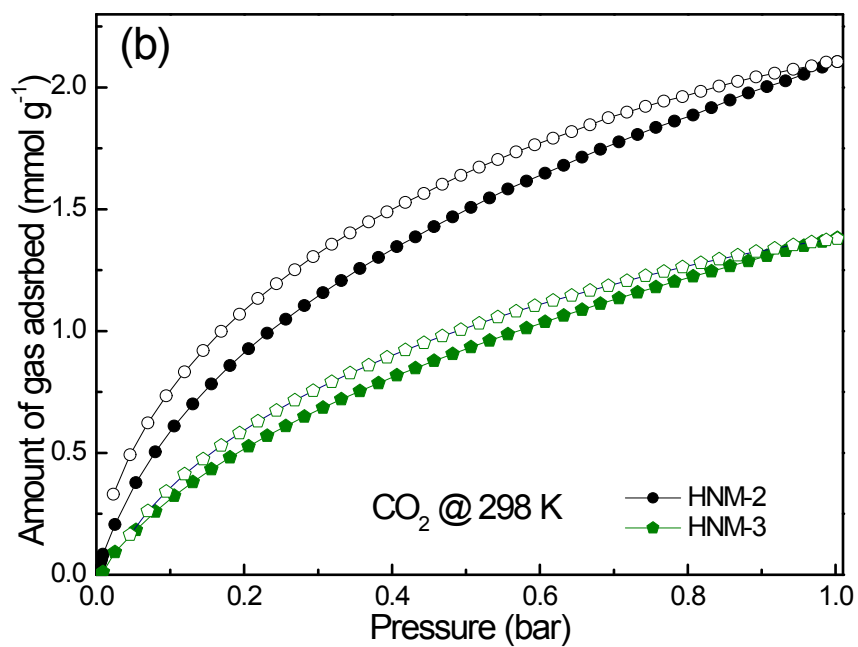

**Figure S13: HNM- 2, 3 CO<sub>2</sub> isotherms; (a) CO<sub>2</sub> sorption isotherms at 273 and (b) 298 K, respectively.**



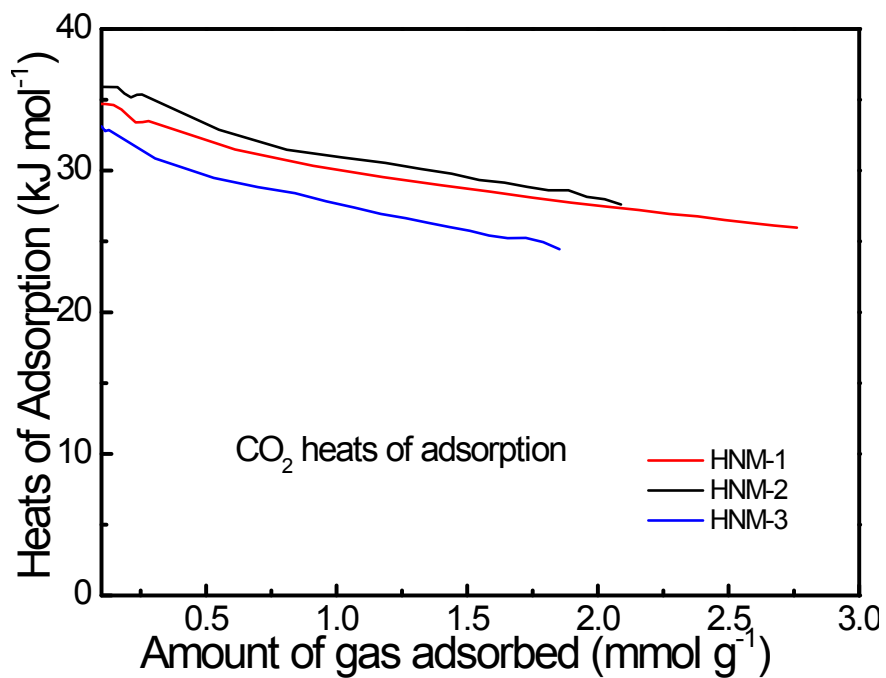

**Figure S14: Isotheric heat of adsorption of HNMs.** Isotheric heats of adsorption for CO<sub>2</sub> have been calculated from CO<sub>2</sub> isotherms collected at 273 and 298 K.

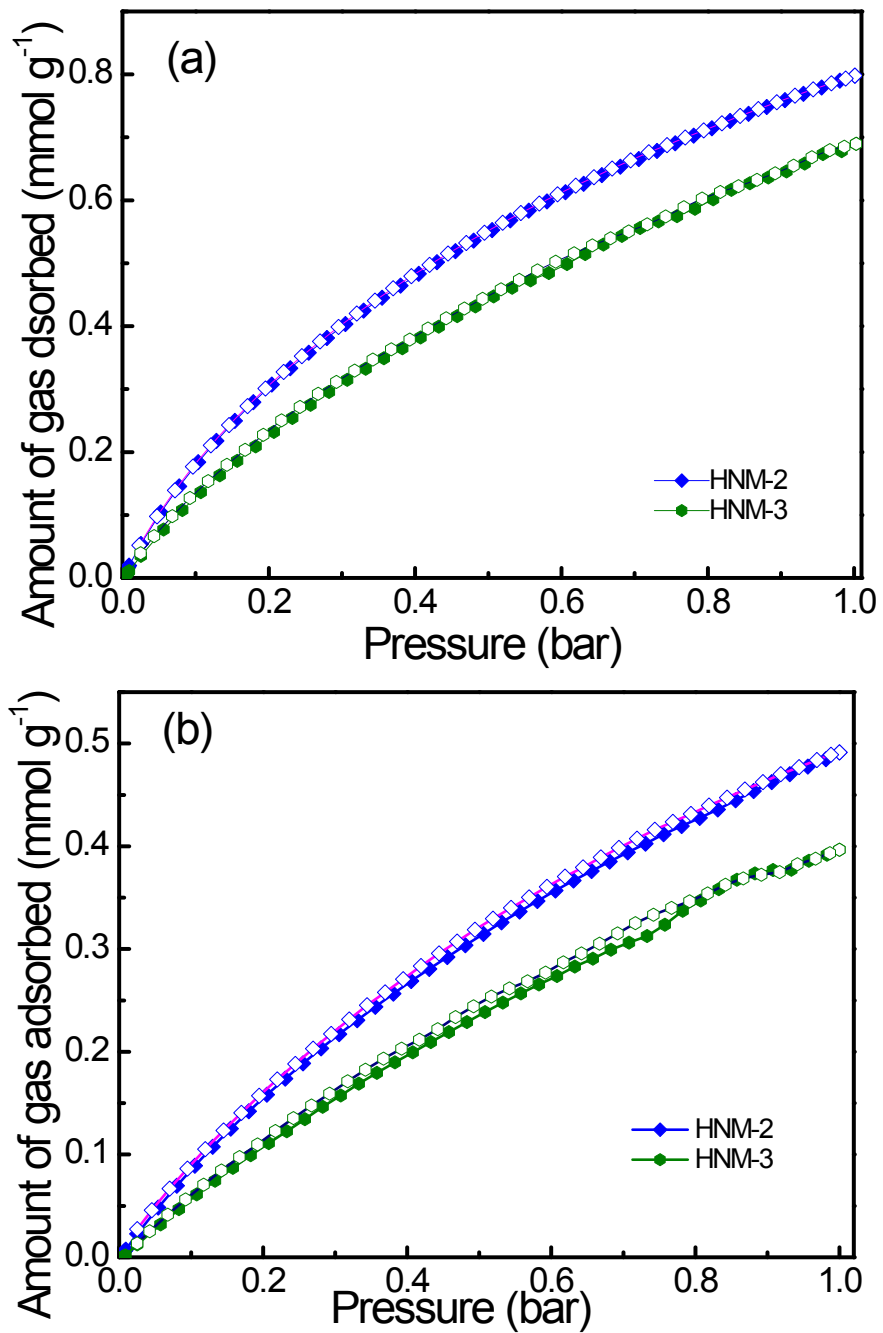

**Figure S15: HNM-2, 3 CH<sub>4</sub> isotherms; (a) CH<sub>4</sub> sorption isotherms at 273 and (b) 298 K, respectively.**

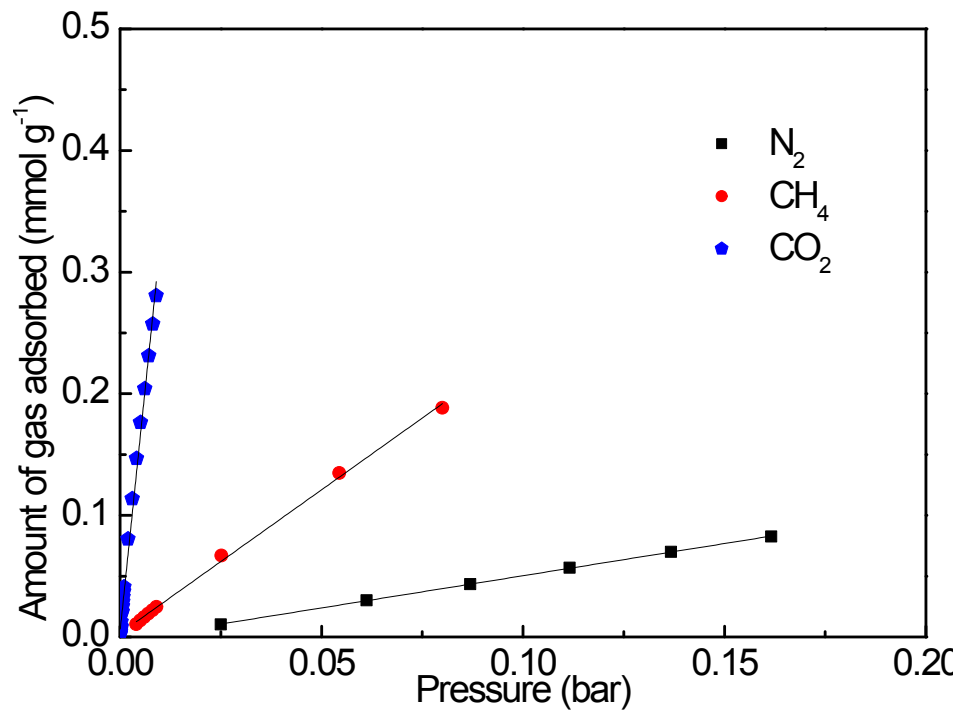

**Figure S16: HNM-1 gas sorption selectivities.** Selectivities of CO<sub>2</sub>:N<sub>2</sub> and CO<sub>2</sub>:CH<sub>4</sub> for HNM-1 at 273 K.

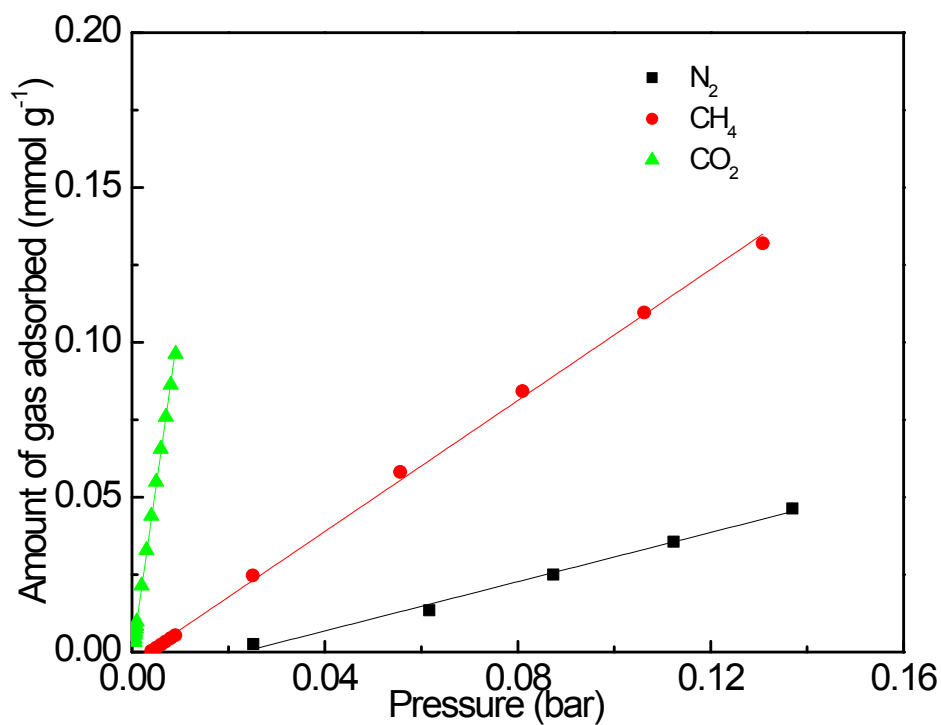

**Figure S17: HNM-1 gas sorption selectivities.** Selectivities of CO<sub>2</sub>:N<sub>2</sub> and CO<sub>2</sub>:CH<sub>4</sub> for HNM-1 at 298 K.

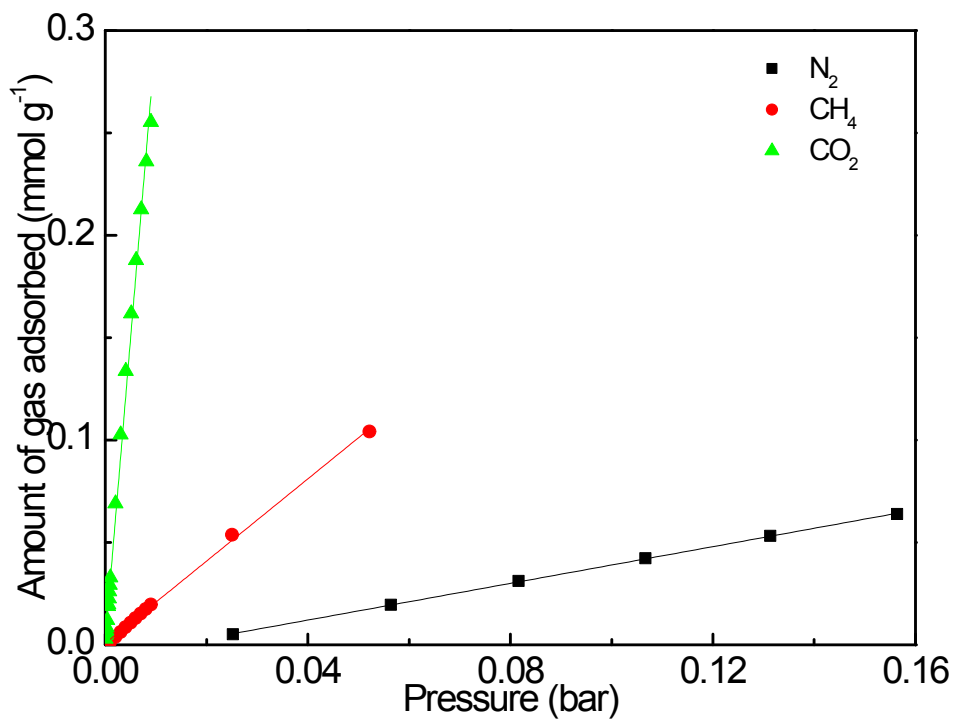

**Figure S18: HNM-2 gas sorption selectivities.** Selectivities of CO<sub>2</sub>:N<sub>2</sub> and CO<sub>2</sub>:CH<sub>4</sub> for HNM-2 at 273 K.

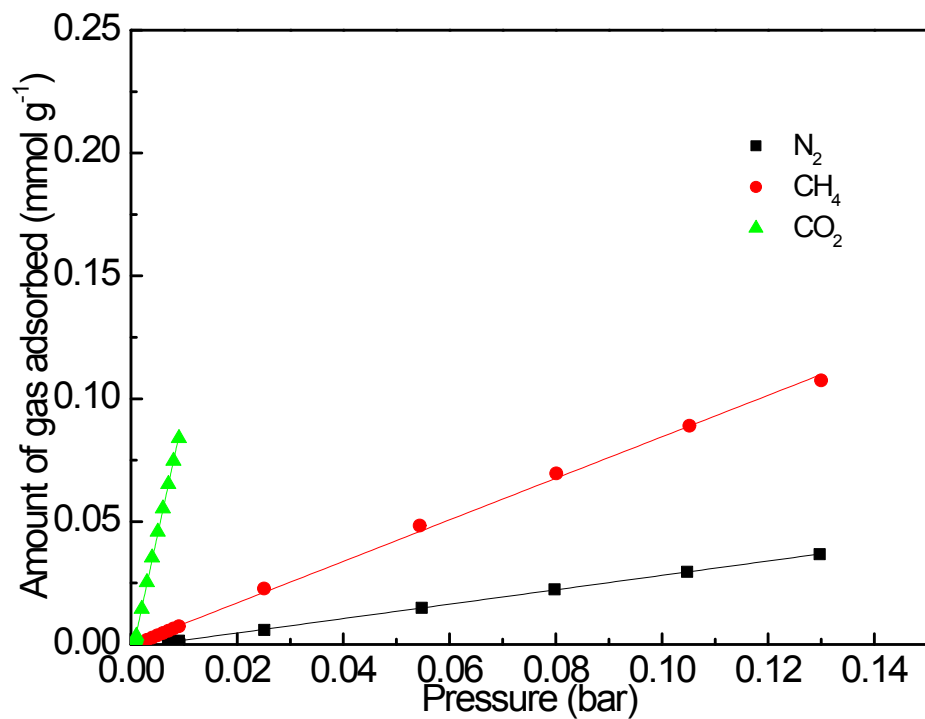

**Figure S19: HNM-2 gas sorption selectivities.** Selectivities of CO<sub>2</sub>:N<sub>2</sub> and CO<sub>2</sub>:CH<sub>4</sub> for HNM-2 at 298 K.

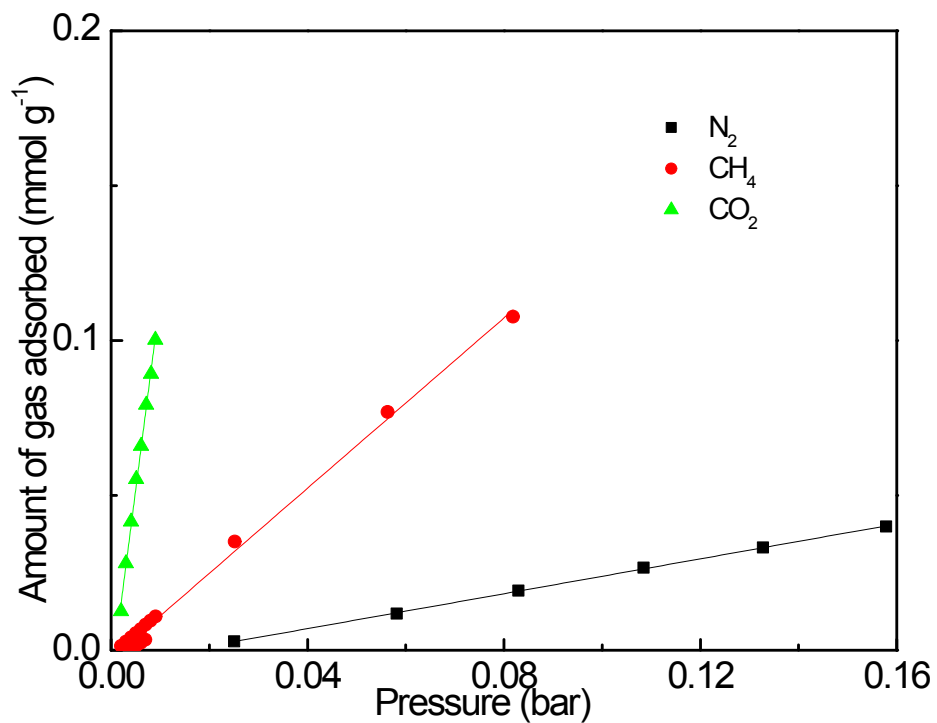

**Figure S20: HNM-3 gas sorption selectivity.** Selectivity of  $\text{CO}_2:\text{N}_2$  and  $\text{CO}_2:\text{CH}_4$  for HNM-3 at 273 K.

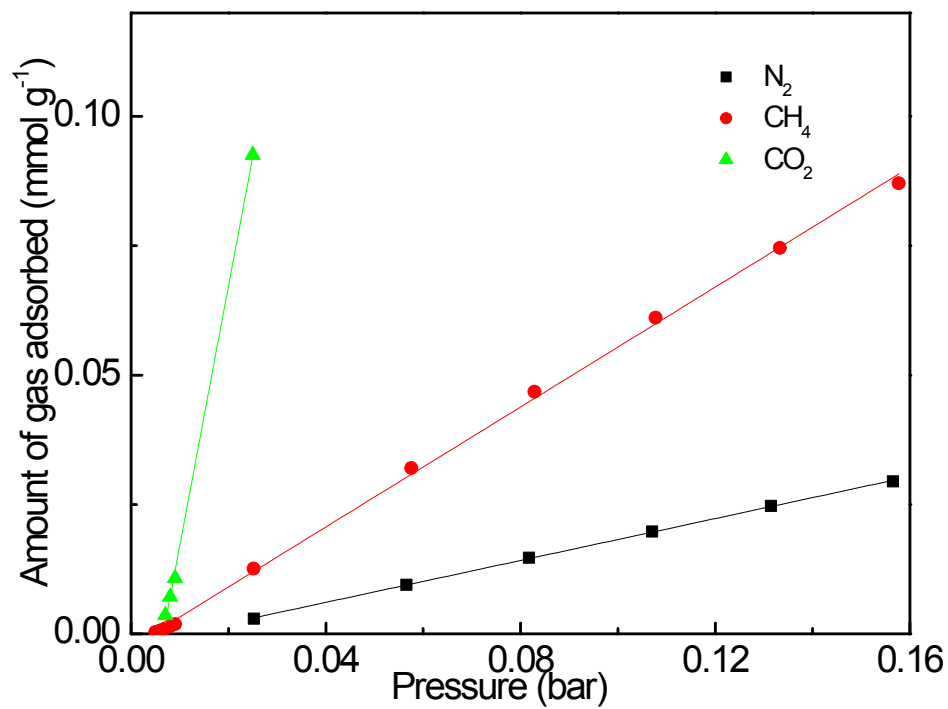

**Figure S21: HNM-3 gas sorption selectivities.** Selectivity of  $\text{CO}_2:\text{N}_2$  and  $\text{CO}_2:\text{CH}_4$  for HNM-3 at 298 K.

**Table S5: Summary of gas adsorption properties of HNMs at low pressure**

| Sample ID | CO <sub>2</sub> uptake |                   |                 | CH <sub>4</sub> uptake |                   |                 | Selectivity                                  |                                               |                                              |                                               | H <sub>2</sub> uptake <sup>e</sup> |
|-----------|------------------------|-------------------|-----------------|------------------------|-------------------|-----------------|----------------------------------------------|-----------------------------------------------|----------------------------------------------|-----------------------------------------------|------------------------------------|
|           | wt % <sup>a</sup>      | wt % <sup>b</sup> | Q <sub>st</sub> | wt % <sup>a</sup>      | wt % <sup>b</sup> | Q <sub>st</sub> | CO <sub>2</sub> /N <sub>2</sub> <sup>c</sup> | CO <sub>2</sub> /CH <sub>4</sub> <sup>c</sup> | CO <sub>2</sub> /N <sub>2</sub> <sup>d</sup> | CO <sub>2</sub> /CH <sub>4</sub> <sup>d</sup> | wt%                                |
| HNM-1     | 18.9                   | 12.3              | 33.0            | 1.79                   | 0.88              | 25.7            | 62                                           | 14                                            | 28                                           | 11                                            | 1.65                               |
| HNM-2     | 13.2                   | 8.16              | 35.9            | 1.48                   | 0.79              | 23.0            | 67                                           | 17                                            | 35                                           | 12                                            | 1.35                               |
| HNM-3     | 9.5                    | 6.08              | 32.0            | 1.10                   | 0.63              | 25.2            | 44                                           | 9                                             | 25                                           | 10                                            | 0.92                               |

<sup>a</sup>273 K, 1 bar; <sup>b</sup>298 K, 1 bar; <sup>c</sup>273 K, 1 bar; <sup>d</sup>298 K, 1 bar; <sup>e</sup>77 K, 1 bar; unit of Q<sub>st</sub>: kJ mol<sup>-1</sup>. Selectivity at 273 and 298 K.

**Table S6: Gas adsorption properties of selected porous materials at low pressure**

Summary of gas adsorption properties of porous materials at low pressure

| Sample ID        | Surface Area <sup>a</sup> |          | CO <sub>2</sub> uptake <sup>c</sup> |                 | Selectivity                     |                                  | Reference |
|------------------|---------------------------|----------|-------------------------------------|-----------------|---------------------------------|----------------------------------|-----------|
|                  | BET                       | Langmuir | wt %                                | Q <sub>st</sub> | CO <sub>2</sub> /N <sub>2</sub> | CO <sub>2</sub> /CH <sub>4</sub> |           |
| PAN-1            | 925                       | 1366     | 14.8                                | 36.5            | 61                              | 12                               | S3        |
| TBILP-1          | 330                       | -        | 11.7                                | 35              | 63                              | 9                                | S4        |
| TBILP-2          | 1080                      | -        | 22.8                                | 29              | 40                              | 7                                | S4        |
| APOP-3           | 1402                      | 1779     | 19.9                                | 27.5            | 27.5                            | 5.3                              | S5        |
| PHM              | 453                       | 620      | 8.05                                | 26              | -                               | -                                | S6        |
| PAF-3            | 2932                      | 3857     | 15.3                                | 19.2            | 87                              | 30                               | S7        |
| BLP-1(H)         | 1360                      | 1744     | 7.4                                 | 25.3            | -                               | -                                | S8        |
| BLP-(12)H        | 2244                      | 2866     | 12.8                                | 25.2            | -                               | -                                | S8        |
| PECONF-3         | 851                       | 969      | 15.35                               | 24.9            | 77                              | 10                               | S9        |
| PPF-1            | 1740                      | 2157     | 26.7                                | 25.6            | 14.5 (1 bar) 273 K              | 11 (1 bar) 273 K                 | S10       |
| BILP-4           | 1135                      | 1486     | 23.5                                | 28.7            | 79                              | 10                               | S11       |
| <i>β</i> -CTF350 | 1235                      | -        | 18.8                                | 32.7            | 27                              | -                                | S12       |
| C-NP             | 946                       | -        | 13.6                                | 28.8            | 29                              | 98                               | S13       |

<sup>a</sup>Unit: m<sup>2</sup> g<sup>-1</sup>. <sup>b</sup>Unit: cm<sup>3</sup> g<sup>-1</sup>. <sup>c</sup>273 K, 1 bar; unit of Q<sub>st</sub>: kJ mol<sup>-1</sup>

## References

- S1. R. Kagit, M. Yildirim, O. Ozay, S. Yesilot and H. Ozay, *Inorg. Chem.*, 2014, **53**, 2144-2151.
- S2. M. G. Schwab, B. Fassbender, H. W. Spiess, A. Thomas, X. Feng and K. Mullen, *J. Am. Chem. Soc.*, 2009, **131**, 7216-7217.
- S3. G. Li, B. Zhang, J. Yan and Z. Wang, *Macromolecules*, 2014, **47**, 6664-6670.
- S4. A. K. Sekizkardes, S. Altarawneh, Z. Kahveci, T. İslamoğlu and H. M. El-Kaderi, *Macromolecules*, 2014, **47**, 8328-8334.
- S5. W. C. Song, X. K. Xu, Q. Chen, Z. Z. Zhuang and X. H. Bu, *Polym. Chem.*, 2013, **4**, 4690-4696.
- S6. P. Rekha, U. Sahoo and P. Mohanty, *RSC Adv.*, 2014, **4**, 34860-34863.
- S7. T. Ben, C. Pei, D. Zhang, J. Xu, F. Deng, X. Jinga and S. Qiu, *Energy Environ. Sci.*, 2011, **4**, 3991-3999.
- S8. K. T. Jackson, M. G. Rabbani, T. E. Reich and H. M. El-Kaderi, *Polym. Chem.*, 2011, **2**, 2775-2777.
- S9. P. Mohanty and L. D. Kull, K. Landskron, *Nature Commun.*, 2011, **2**, 401-406.
- S10. Y. Zhu, H. Long and W. Zhang, *Chem. Mater.*, 2013, **25**, 1630-1635.
- S11. M. G. Rabbani and H. M. El-Kaderi, *Chem. Mater.*, 2012, **24**, 1511-1517.
- S12. S. Hug, M. B. Mesch, H. Oh, N. Popp, M. Hirscher, J. Senker and B. V. Lotsch, *J. Mater. Chem. A*, 2014, **2**, 5928-5936.
- S13. M. Saleh and K. S. Kim, *RSC Adv.*, 2015, **5**, 41745 - 41750.
